# Supplementary material
Source: ML conference proceedings conference paper supplement (https://proceedings.neurips.cc/paper_files/paper/2018/hash/03b2ceb73723f8b53cd533e4fba898ee-Abstract.html)
Supplement: Supplementary file [file 03b2ceb73723f8b53cd533e4fba898ee-Supplemental.zip]

## A Supplementary Material

We now provide proofs of the theoretical results stated in the main text.

### Proof of Proposition 1

*Proof.* Start with a  $p$ -term  $k$ -DNF defined over a set of  $n$  Boolean variables. Encode the  $j$ 'th term in the DNF formula by a vector  $w_j \in \{-1, 0, 1\}^n$ , where

$$w_{j,l} = \begin{cases} 1 & l\text{'th variable appears as positive} \\ -1 & l\text{'th variable appears as negative} \\ 0 & l\text{'th variable doesn't appear} \end{cases} . \quad (14)$$

Notice that the resulting vector is  $k$ -sparse. Next, let  $x \in \{-1, 1\}^n$  encode the Boolean assignment of the input variables, where  $x_l = 1$  encodes that the  $l$ 'th variable is true and  $x_l = -1$  encodes that it is false. Note that the  $j$ 'th term of the DNF is satisfied if and only if  $w_j \cdot x \geq k$ . Moreover, note that the entire DNF is satisfied if and only if

$$\max_{j \in [p]} w_j \cdot x \geq k , \quad (15)$$

where we use  $[p]$  as shorthand for the set  $\{1, \dots, p\}$ . We relax this definition by allowing the input  $x$  to be an arbitrary vector in  $\mathbb{R}^n$  and allowing each  $w_j$  to be any  $k$ -sparse vector in  $\mathbb{R}^n$ . By construction, the class of models of this form is at least as powerful as the original class of  $p$ -term  $k$ -DNF Boolean formulae. Therefore, learning this class of models is a form of improper learning of  $k$ -DNFs.  $\square$

Note that once we allow  $x$  and  $w_j$  to take arbitrary real values, the threshold  $k$  in (15) becomes somewhat arbitrary, so we replace it with zero in our decision rule.

### Proof of Proposition 2

*Proof.* By definition, the Fenchel conjugate

$$u^*(s) = \sup_{t \in \mathbb{R}^p} \left( \sum_{k=1}^p s_k t_k - \log \left( 1 + \sum_{k=1}^p \exp(-t_k) \right) \right) .$$

Equating the partial derivative with respect to each  $t_k$  to 0, we get

$$s_k = - \frac{\exp(-t_k^*)}{1 + \sum_{c=1}^p \exp(-t_c^*)} , \quad (16)$$

or equivalently,

$$t_k^* = -\log \left( -s_k \left( 1 + \sum_{c=1}^p \exp(-t_c^*) \right) \right) .$$

We note from (16) that

$$\frac{1}{1 + \sum_{c=1}^p \exp(-t_c^*)} = 1 + s^\top \mathbf{1} .$$

Using the convention  $0 \log 0 = 0$ , the form of the conjugate function in (9) can be obtained by plugging  $t^* = (t_1^*, \dots, t_p^*)$  into  $u^*(s)$  and performing some simple algebraic manipulations.

Proposition 2 follows directly from the form of  $u^*$ , especially the constraint set  $\mathcal{S}_i$  for  $i \in I_-$ . For  $i \in I_+$ , we notice that the conjugate of  $\ell(z) = \log(1 + \exp(-z))$  is

$$\ell^*(\beta) = (-\beta) \log(-\beta) + (1 + \beta) \log(1 + \beta), \quad \beta \in [-1, 0].$$

Then we can let the  $j(i)$ th entry of  $s_i \in \mathbb{R}^p$  be  $\beta \in [-1, 0]$  and all other entries be zero. Then we can express  $\ell^*$  through  $u^*$  as shown in the proposition.  $\square$

### Proof of Proposition 3

*Proof.* Recall that

$$\Phi(W, \epsilon, S) = \frac{1}{m} \sum_{i \in [m]} \left( y_i s_i^T (W \odot \epsilon) x_i - u^*(s_i) \right) + \frac{\lambda}{2} \|W\|_F^2.$$

Then

$$\nabla_W \Phi(W, \epsilon, S) = \frac{1}{m} \sum_{i \in [m]} y_i (s_i x_i^T) \odot \epsilon + \lambda W.$$

The proof is complete by setting  $\nabla_W \Phi(W, \epsilon, S) = 0$ , and solving for  $W$ .  $\square$

### Proof of Proposition 4

*Proof.* In order to project  $a \in \mathbb{R}^n$  onto

$$\mathcal{E}_j \triangleq \{\epsilon_j \in \mathbb{R}^n : \epsilon_{ji} \in [0, 1], \|\epsilon_j\|_1 \leq k\},$$

we need to solve the following problem:

$$\begin{aligned} \min_{x \in \mathbb{R}^n} \quad & \frac{1}{2} \|x - a\|^2 \\ \text{s.t.} \quad & \sum_{i=1}^d x_i \leq k \\ \forall i \in [n] : \quad & 0 \leq x_i \leq 1. \end{aligned}$$

Our approach is to form a Lagrangian and then invoke the KKT conditions. Introducing Lagrangian parameters  $\lambda \in \mathbb{R}_+$  and  $u, v \in \mathbb{R}_+^d$ , we get the Lagrangian  $L(x, \lambda, u, v)$

$$\begin{aligned} &= \frac{1}{2} \|x - a\|^2 + \lambda \left( \sum_{i=1}^n x_i - k \right) - \sum_{i=1}^n u_i x_i \\ &\quad + \sum_{i=1}^n v_i (x_i - 1) \\ &= \frac{1}{2} \|x - a\|^2 + \sum_{i=1}^n x_i (\lambda - u_i + v_i) \\ &\quad - \lambda k - \sum_{i=1}^n v_i. \end{aligned}$$

Therefore,

$$\nabla_{x^*} L = 0 \implies x^* = a - (\lambda \mathbf{1} - u + v). \quad (17)$$

We note that  $g(\lambda, u, v) \triangleq L(x^*, \lambda, u, v)$

$$= -\frac{1}{2} \|\lambda \mathbf{1} - u + v\|^2 + a^\top (\lambda \mathbf{1} - u + v) - \lambda K - \mathbf{1}^\top v.$$

Using the notation  $b \succeq t$  to mean that each coordinate of vector  $b$  is at least  $t$ , our dual is

$$\max_{\lambda \geq 0, u \geq 0, v \geq 0} g(\lambda, u, v). \quad (18)$$

We now list all the KKT conditions:

$$\begin{aligned}
\forall i \in [n] : \quad x_i > 0 &\implies u_i = 0 \\
\forall i \in [n] : \quad x_i < 1 &\implies v_i = 0 \\
\forall i \in [n] : \quad u_i > 0 &\implies x_i = 0 \\
\forall i \in [n] : \quad v_i > 0 &\implies x_i = 1 \quad . \\
\forall i \in [n] : \quad u_i v_i &= 0 \\
\sum_{i=1}^n x_i < k &\implies \lambda = 0 \\
\lambda > 0 &\implies \sum_{i=1}^n x_i = k
\end{aligned}$$

We consider the two cases, (a)  $\sum_{i=1}^n x_i^* < k$ , and (b)  $\sum_{i=1}^n x_i^* = k$  separately.

First consider  $\sum_{i=1}^n x_i^* < k$ . Then, by KKT conditions, we have the corresponding  $\lambda = 0$ . Consider all the sub-cases. Using (17), we get

1.  $x_i^* = 0 \implies a_i = \lambda - u_i + v_i = -u_i \leq 0$  (since  $x_i^* < 1$ , therefore, by KKT conditions,  $v_i = 0$ ).
2.  $x_i^* = 1 \implies a_i = 1 + \lambda - u_i + v_i = 1 + v_i \geq 1$  (since  $x_i^* > 0$ , therefore,  $u_i = 0$  by KKT conditions).
3.  $0 < x_i^* < 1 \implies a_i = x_i^* + \lambda - u_i + v_i = x_i^*$ .

Now consider  $\sum_{i=1}^n x_i^* = k$ . Then, we have  $\lambda \geq 0$ . Again, we look at the various sub-cases.

1.  $x_i^* = 0 \implies a_i = \lambda - u_i + v_i = \lambda - u_i \implies u_i = -(a_i - \lambda)$ . Here,  $u_i$  denotes the amount of clipping done when  $a_i$  is negative.
2.  $x_i^* = 1 \implies a_i = 1 + \lambda - u_i + v_i = 1 + \lambda + v_i \implies v_i = -(1 + \lambda - a_i)$ . Here,  $v_i$  denotes the amount of clipping done when  $a_i > 1$ . Also, note that  $a_i \geq 1$  in this case.
3.  $0 < x_i^* < 1 \implies a_i = x_i^* + \lambda - u_i + v_i = x_i^* + \lambda \implies x_i^* = a_i - \lambda$ . In order to determine the value of  $\lambda$ , we note that since  $\sum_{i=1}^n x_i^* = k$ , therefore,

$$\begin{aligned}
\sum_{i=1}^n (a_i - \lambda) &= k \implies \sum_{i=1}^n a_i - n\lambda = k \\
\implies \lambda &= \frac{1}{n} \sum_{i=1}^n a_i - \frac{k}{n} \leq \max_i a_i - \frac{k}{n} \quad .
\end{aligned}$$

Algorithm 2 implements all the cases and thus accomplishes the desired projection. The algorithm is a bisection method, and thus converges linearly to a solution within the specified tolerance  $tol$ .  $\square$
